# Supplementary material for: Metabolic Fate Is Defined by Amino Acid Nature in Gilthead Seabream Fed Different Diet Formulations
Source: MDPI journal article supplement (doi:10.3390/ani12131713), 2022-07-02
Supplement: s1 [file s1]

**Table S1.** Proportion (%) of the total recovered <sup>14</sup>C-lysine (Lys), <sup>14</sup>C-tryptophan (Trp) and <sup>14</sup>C-methionine (Met) that was evacuated, retained in the gut, liver and muscle, or catabolised in gilthead seabream juveniles fed 44P21L, 44P18L, 40P21L or 40P18L diets.

| %          | Dietary Treatment        |                          |                           |                          |                          |                           |                           |                           |                            |                           |                          |                           | Two-way ANOVA ( <i>P</i> < 0.05) |      |           |
|------------|--------------------------|--------------------------|---------------------------|--------------------------|--------------------------|---------------------------|---------------------------|---------------------------|----------------------------|---------------------------|--------------------------|---------------------------|----------------------------------|------|-----------|
|            | 44P21L                   |                          |                           | 44P18L                   |                          |                           | 40P21L                    |                           |                            | 40P18L                    |                          |                           |                                  |      |           |
|            | LYS                      | TRP                      | MET                       | LYS                      | TRP                      | MET                       | LYS                       | TRP                       | MET                        | LYS                       | TRP                      | MET                       | AA                               | Diet | AA × Diet |
| Evacuation | 20.9 ± 6.7 <sup>b</sup>  | 66.7 ± 17.5 <sup>a</sup> | 41.6 ± 10.9 <sup>b</sup>  | 32.9 ± 11.9 <sup>b</sup> | 58.0 ± 10.8 <sup>a</sup> | 26.9 ± 6.0 <sup>b</sup>   | 26.8 ± 9.0 <sup>b</sup>   | 59.6 ± 3.2 <sup>a</sup>   | 31.3 ± 5.0 <sup>b</sup>    | 22.0 ± 15.5 <sup>b</sup>  | 57.2 ± 8.6 <sup>a</sup>  | 29.1 ± 6.5 <sup>b</sup>   | ***                              | NS   | NS        |
| Gut        | 14.1 ± 3.9 <sup>a</sup>  | 11.3 ± 7.7 <sup>ab</sup> | 8.9 ± 3.6 <sup>b</sup>    | 10.7 ± 5.0 <sup>a</sup>  | 12.7 ± 4.0 <sup>ab</sup> | 11.5 ± 3.6 <sup>b</sup>   | 18.6 ± 5.4 <sup>a</sup>   | 13.5 ± 1.9 <sup>ab</sup>  | 12.0 ± 2.3 <sup>b</sup>    | 18.6 ± 6.4 <sup>a</sup>   | 13.7 ± 5.4 <sup>ab</sup> | 12.3 ± 2.7 <sup>b</sup>   | *                                | *    | NS        |
| Liver      | 8.7 ± 2.7 <sup>a,y</sup> | 4.3 ± 2.1 <sup>b,y</sup> | 4.5 ± 1.0 <sup>ab,y</sup> | 5.4 ± 1.5 <sup>a,y</sup> | 5.9 ± 2.4 <sup>b,y</sup> | 6.1 ± 1.4 <sup>ab,y</sup> | 7.6 ± 2.9 <sup>a,xy</sup> | 6.4 ± 0.8 <sup>b,xy</sup> | 6.9 ± 1.1 <sup>ab,xy</sup> | 10.6 ± 5.1 <sup>a,y</sup> | 7.6 ± 2.1 <sup>b,y</sup> | 7.6 ± 2.9 <sup>ab,y</sup> | *                                | **   | NS        |
| Muscle     | 24.9 ± 6.4 <sup>b</sup>  | 6.5 ± 3.7 <sup>c</sup>   | 30.5 ± 7.6 <sup>a</sup>   | 26.8 ± 10.7 <sup>b</sup> | 9.4 ± 3.6 <sup>c</sup>   | 37.6 ± 14.3 <sup>a</sup>  | 24.4 ± 8.9 <sup>b</sup>   | 10.2 ± 1.5 <sup>c</sup>   | 38.6 ± 5.8 <sup>a</sup>    | 28.0 ± 8.0 <sup>b</sup>   | 7.4 ± 1.2 <sup>c</sup>   | 40.1 ± 8.7 <sup>a</sup>   | ***                              | NS   | NS        |
| Catabolism | 31.3 ± 6.4 <sup>a</sup>  | 11.3 ± 5.0 <sup>b</sup>  | 14.5 ± 2.8 <sup>b</sup>   | 24.3 ± 6.5 <sup>a</sup>  | 14.0 ± 4.8 <sup>b</sup>  | 17.9 ± 16.4 <sup>b</sup>  | 22.6 ± 10.0 <sup>a</sup>  | 10.3 ± 3.4 <sup>b</sup>   | 11.1 ± 4.5 <sup>b</sup>    | 20.8 ± 7.9 <sup>a</sup>   | 14.1 ± 2.9 <sup>b</sup>  | 10.9 ± 7.4 <sup>b</sup>   | ***                              | NS   | NS        |

Values are presented as mean ± standard deviation (*n* = 6 fish for each diet and amino acid). Within a row, superscript letters *a,b,c* represent significant differences in the metabolic fate of the distinct amino acids at each dietary treatment; *x,y* denote significant differences between dietary treatments (\**P* < 0.05; \*\**P* < 0.01; \*\*\**P* < 0.001); NS: non-significant (*P* > 0.05).
